# Supplementary material for: Prognostic value of the systemic immune-inflammation index in non-muscle invasive bladder cancer
Source: PubMed Central journal article supplement (PMC8602174; doi:10.1007/s00345-021-03740-3), 2021-06-18

**Supplementary figure 1.**

Kaplan-Meier analysis for recurrence-free survival (RFS) (A), progression-free survival (PFS) (B), overall survival (OS) (C), and cancer-specific survival (CSS) (D) in patients underwent transurethral resection of the bladder (TURB) for non-muscle invasive bladder cancer according to the preoperative systemic immune-inflammation index (SII) level.

**Supplementary figure 1A**

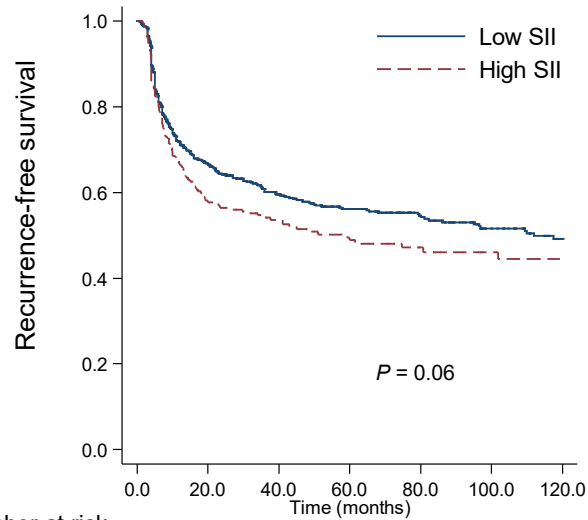

Number at risk

|          |     |     |     |     |     |     |    |
|----------|-----|-----|-----|-----|-----|-----|----|
| Low SII  | 808 | 433 | 298 | 213 | 147 | 100 | 66 |
| High SII | 309 | 142 | 101 | 73  | 45  | 29  | 22 |

**Supplementary figure 1C**

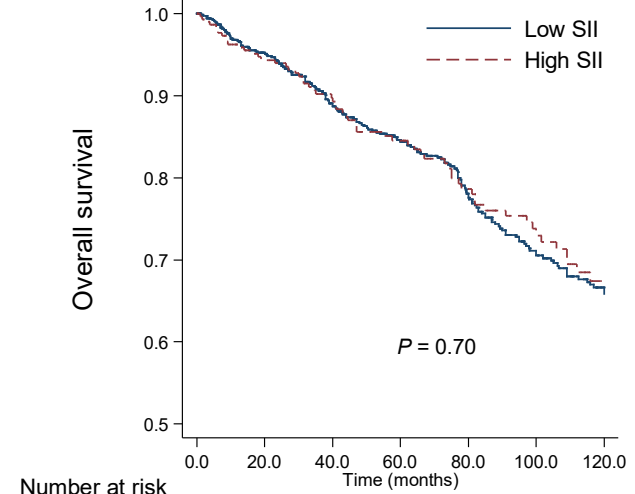

Number at risk

|          |     |     |     |     |     |     |     |
|----------|-----|-----|-----|-----|-----|-----|-----|
| Low SII  | 808 | 648 | 524 | 424 | 323 | 243 | 178 |
| High SII | 309 | 242 | 198 | 163 | 125 | 92  | 59  |

**Supplementary figure 1B**

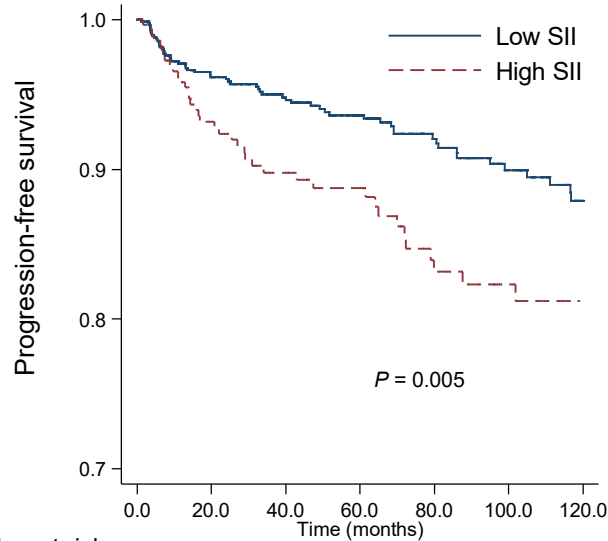

Number at risk

|          |     |     |     |     |     |     |     |
|----------|-----|-----|-----|-----|-----|-----|-----|
| Low SII  | 808 | 628 | 503 | 405 | 298 | 215 | 149 |
| High SII | 309 | 234 | 184 | 151 | 106 | 77  | 48  |

**Supplementary figure 1D**

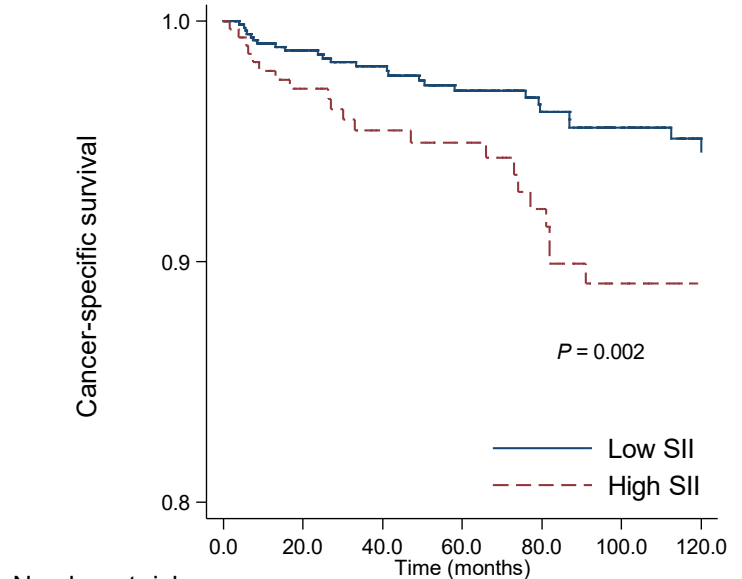

Number at risk

|          |     |     |     |     |     |     |     |
|----------|-----|-----|-----|-----|-----|-----|-----|
| Low SII  | 808 | 648 | 524 | 424 | 323 | 243 | 178 |
| High SII | 309 | 242 | 198 | 163 | 125 | 92  | 59  |

## Supplementary figure 2

Decision curve analysis (DCA) for the net-benefit of systemic immune-inflammation index (SII) in the predictive model based on age, sex, tumor size, multifocality, tumor grade, and tumor stage, for recurrence-free survival (RFS) (A), progression-free survival (PFS) (B), overall survival (OS) (C), and cancer-specific survival (CSS) (D) for patients with intermediate-risk.

Supplementary figure 2A

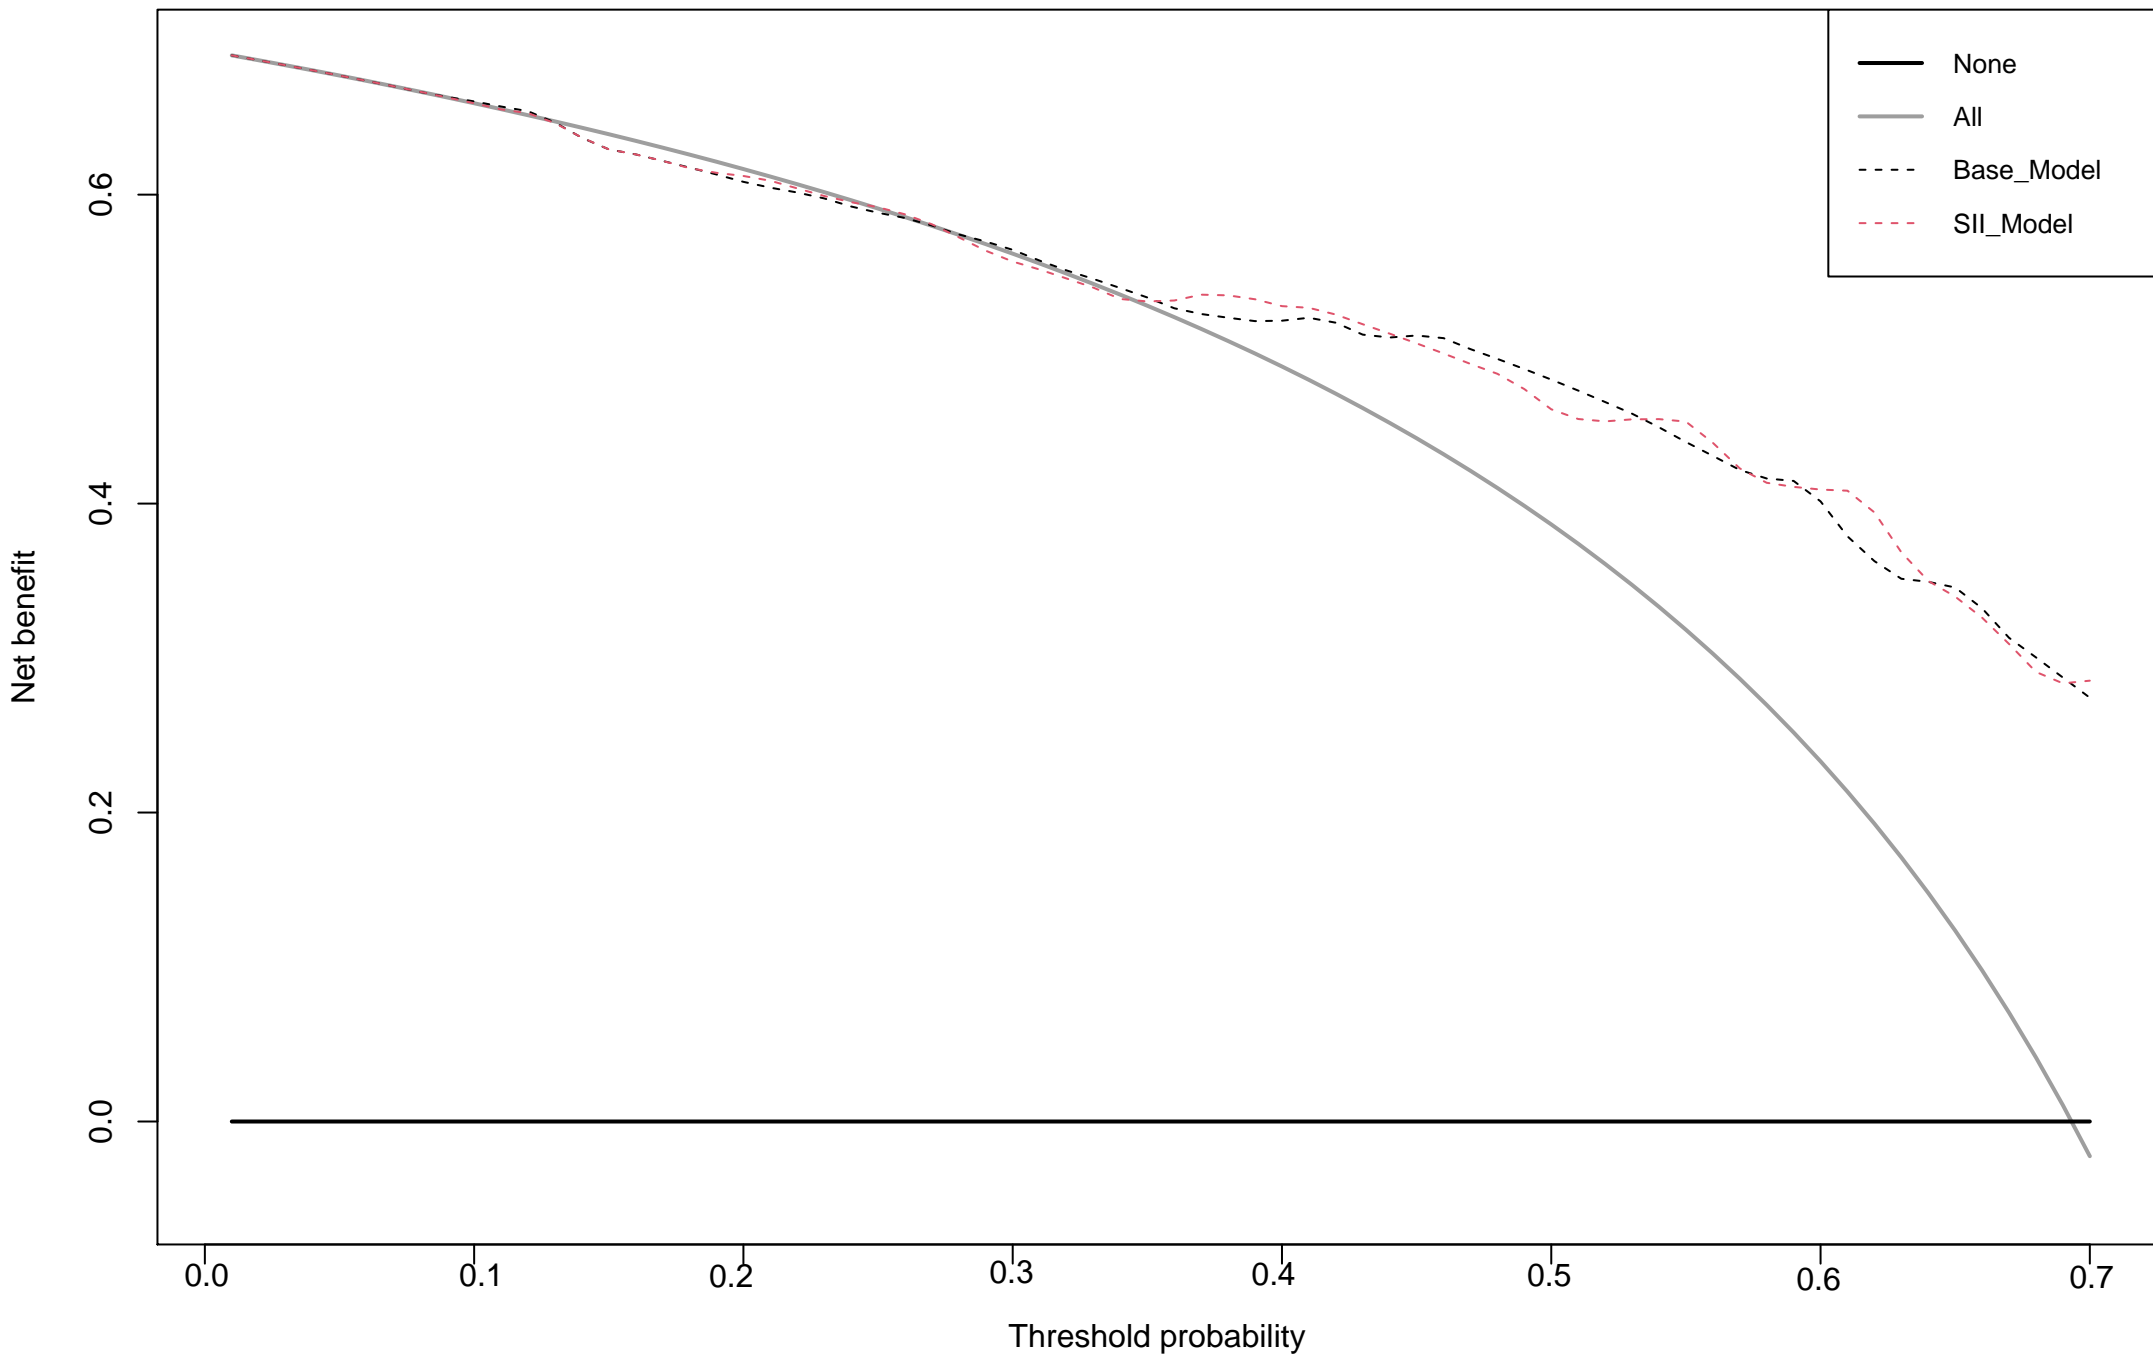

Supplementary figure 2B

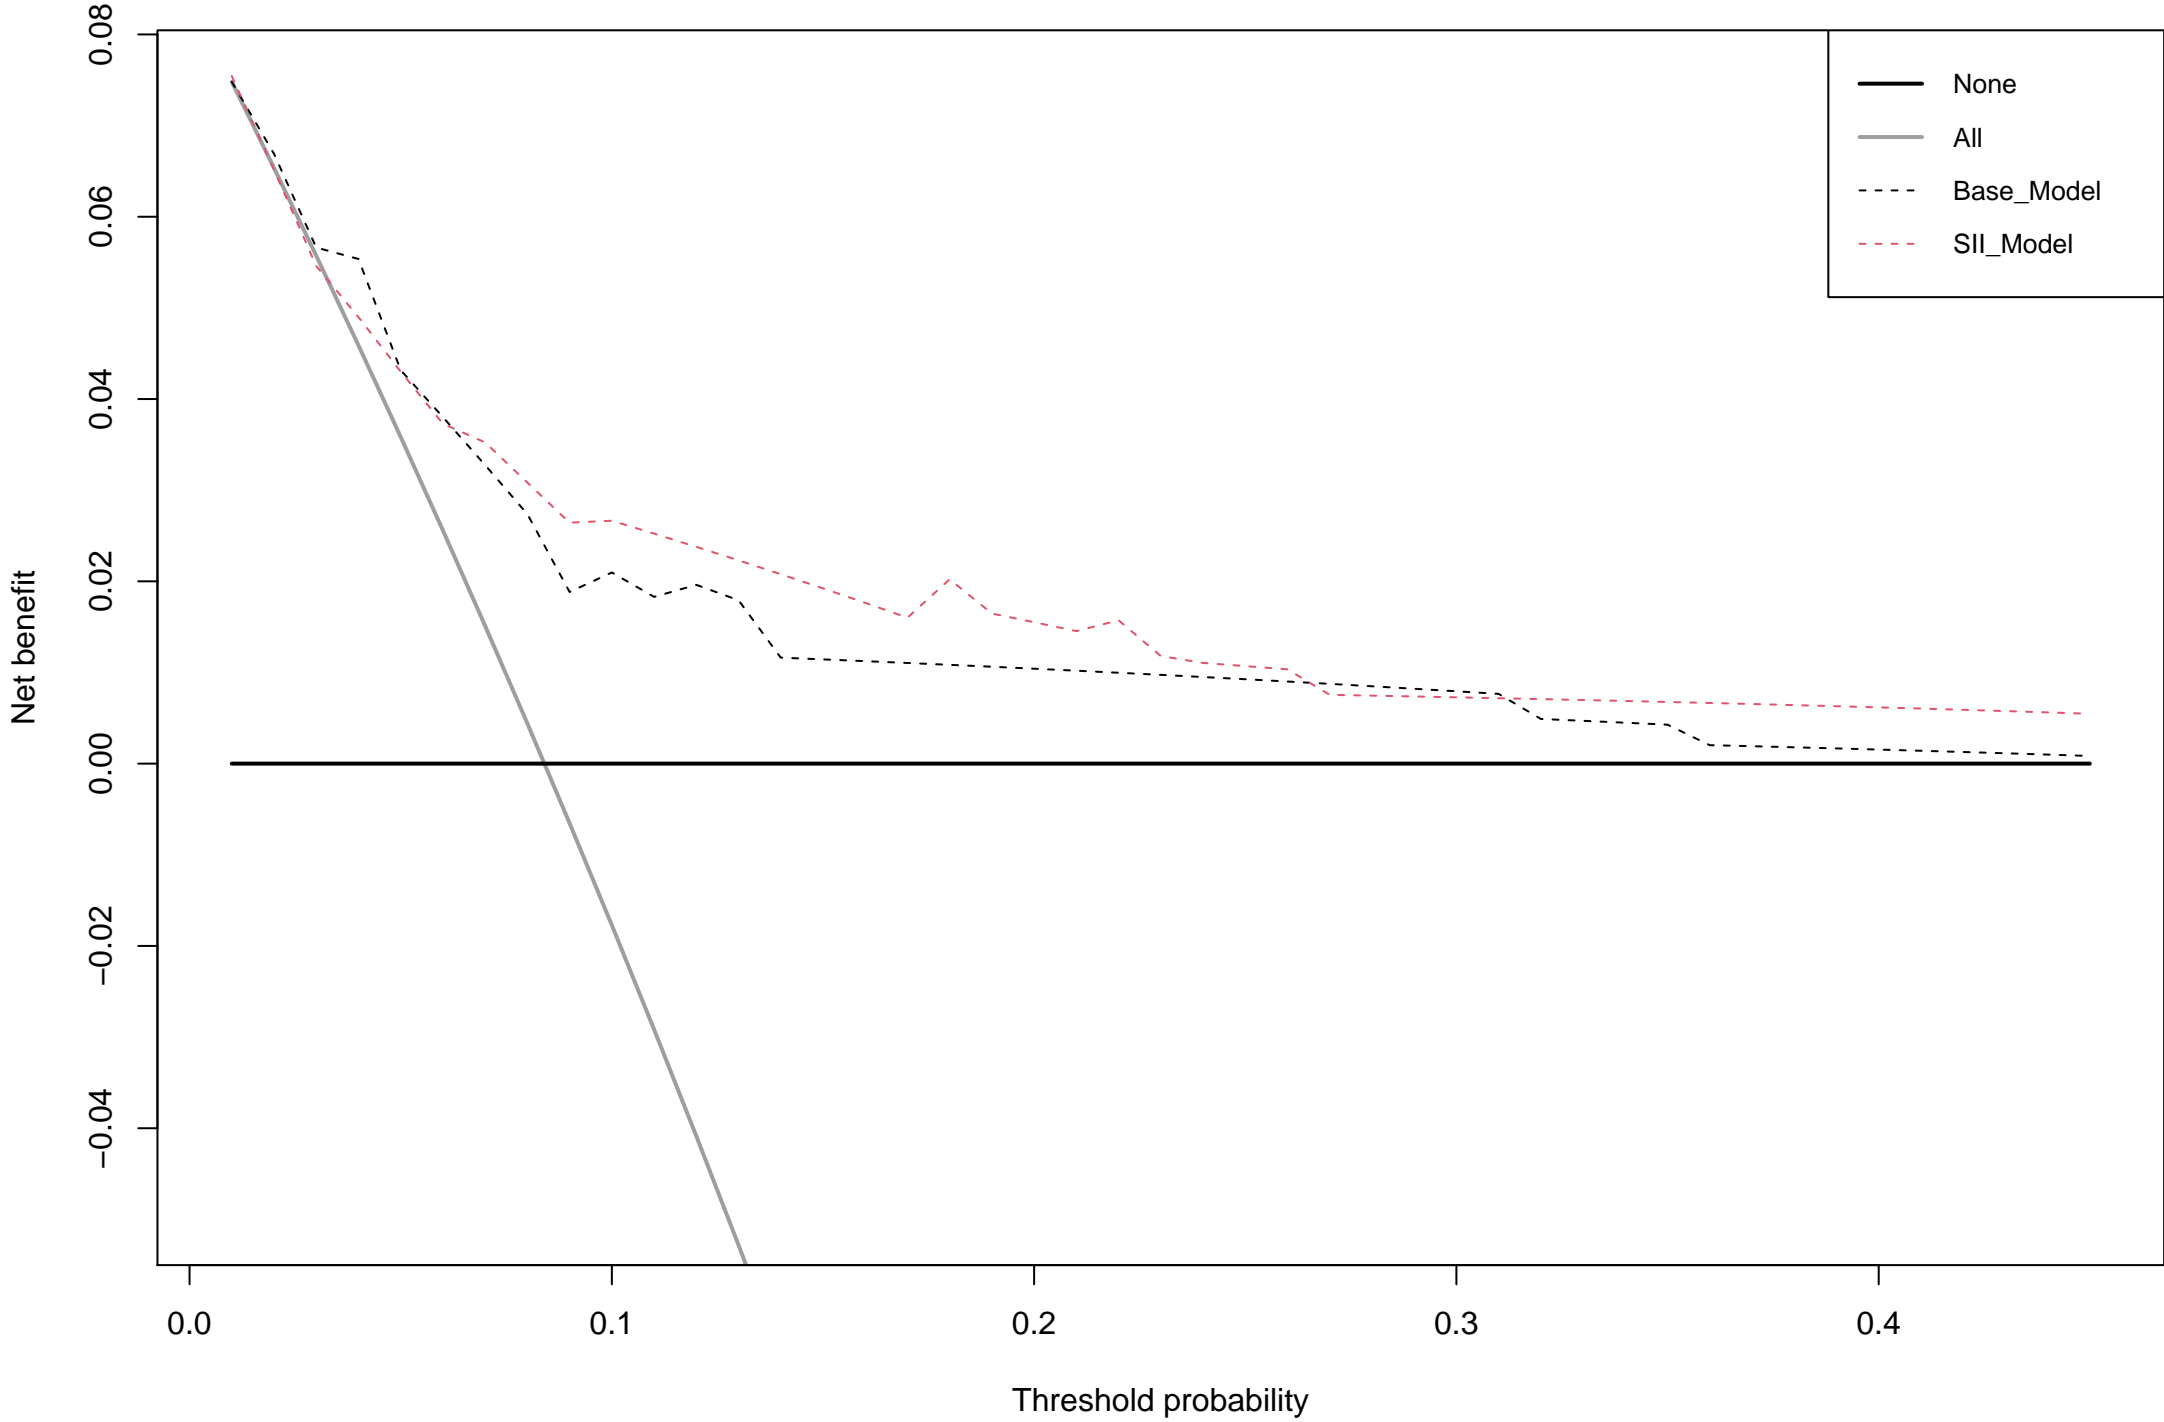

Supplementary figure 2C

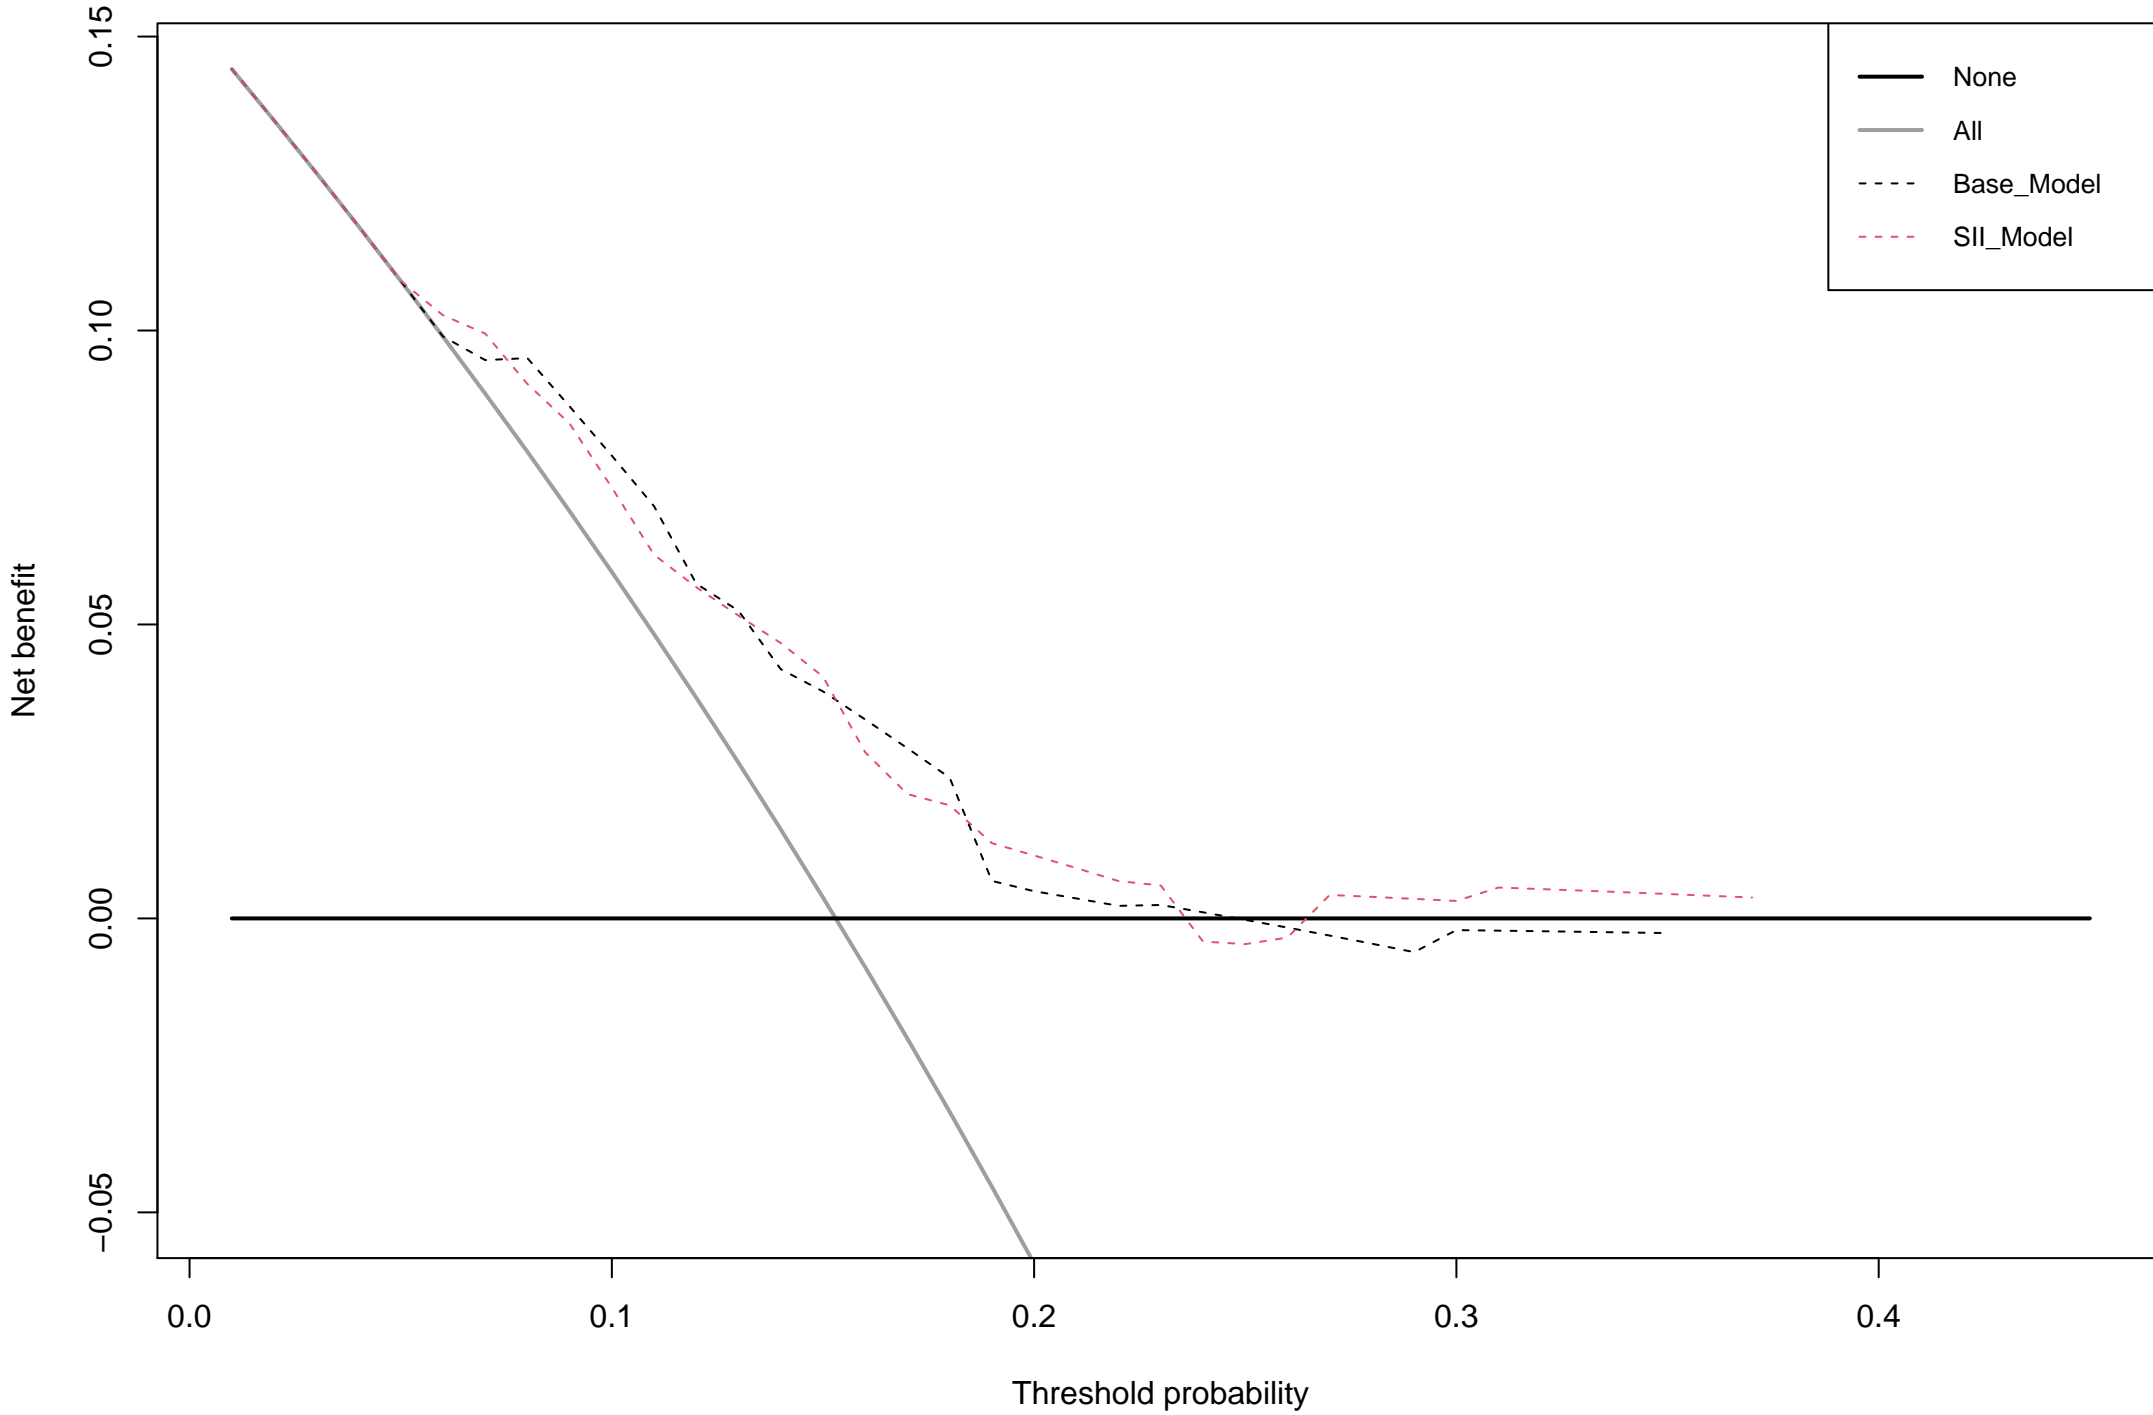

Supplementary figure 2D

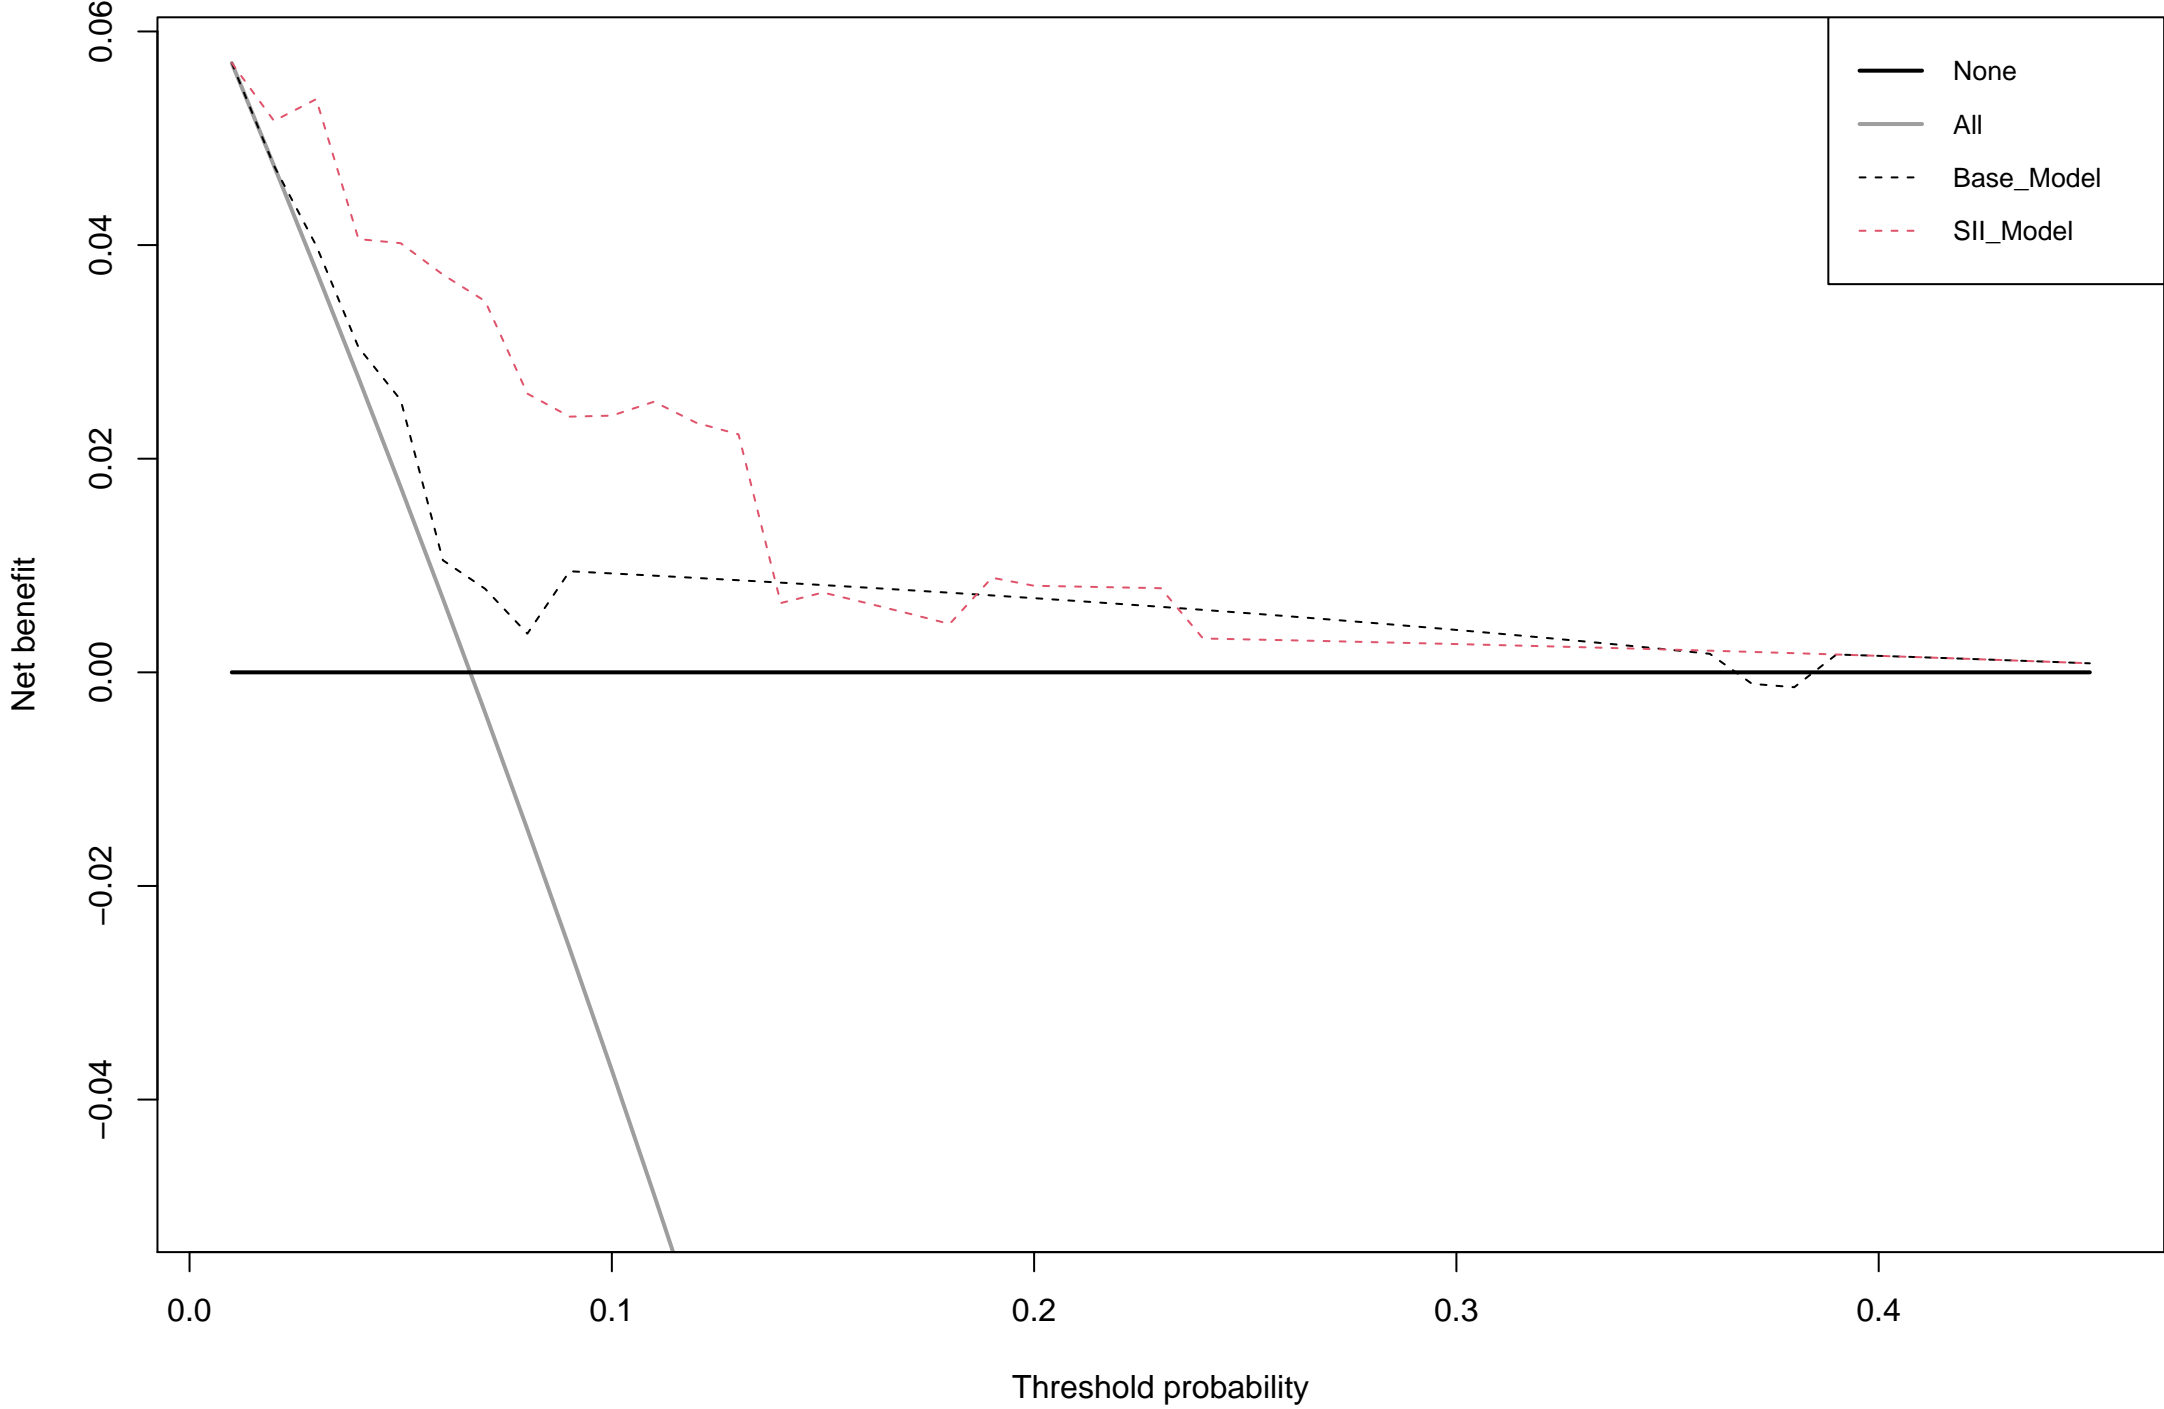

Supplement: 345_2021_3740_MOESM1_ESM.pdf [file 345_2021_3740_MOESM1_ESM.pdf]
